# Supplementary material for: Migration behaviour of discontinuous buffers in capillary electrophoresis during protein enrichment
Source: Royal Society of Chemistry journal article supplement (doi:10.1039/c2an35548e), 2012-01-01
Supplement: c2an35548e.pdf [file c2an35548e.pdf]

## Supporting information

# Migration Behaviour of Discontinuous Buffers in Capillary Electrophores during Protein Enrichment

Ting Li,<sup>a</sup> Christina J. Booker<sup>a</sup> and Ken K.-C. Yeung<sup>\*a</sup>

<sup>a</sup> Department of Chemistry and Department of Biochemistry,  
The University of Western Ontario, London, Ontario, Canada.

Tel: +1 (519) 661 2111

\*E-mail: [kyeung@uwo.ca](mailto:kyeung@uwo.ca)

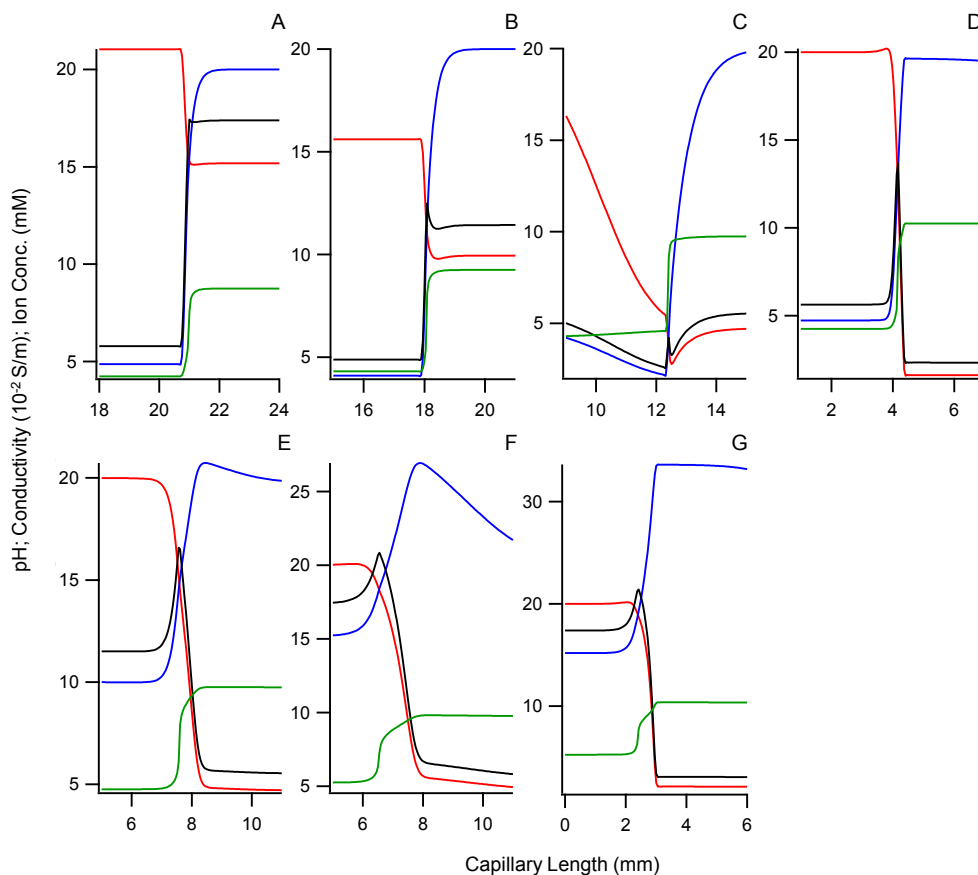

**Figure S1.** Simulated results of discontinuous buffers under various pH combinations at  $t = 1000$  seconds. The pH values of acetate/ammonium buffer were: (A) 4.25/8.75, (B) 4.25/9.25, (C) 4.25/9.75, (D) 4.25/10.25, (E) 4.75/9.75, (F) 5.25/9.75, and (G) 5.25/10.25. Panels (A-D) correspond to single myoglobin peaks observed in Fig. 3B. Panels (E-G) correspond to split myoglobin peaks observed in Fig. 3B. Acetate conc. (—), conductivity (—), ammonium conc. (—), and pH (—). Computer simulation conditions were same as in Fig. 3A.

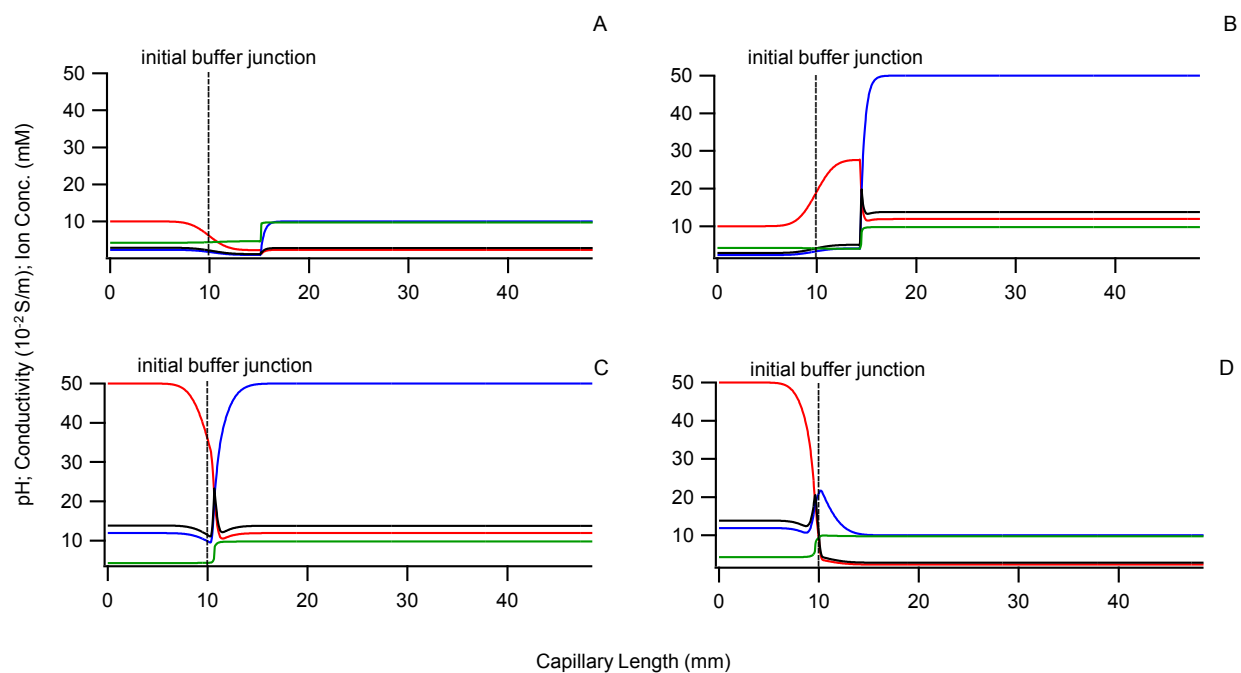

**Figure S2.** Simulated results of discontinuous buffers under various concentrations (acetate/ammonium, mM/mM) at  $t = 1000$  seconds: (A) 10/10, (B) 10/50, (C) 50/50, and (D) 50/10. Acetate conc. (—), conductivity (—), ammonium conc. (—), and pH (—). Initial buffer junction at 10 mm, the computer simulation setup same as in Fig. 4A.
